# Supplementary material for: Revealing Novel Source of Breast Cancer Inhibitors from Seagrass Enhalus acoroides: In Silico and In Vitro Studies
Source: MDPI journal article supplement (doi:10.3390/molecules29051082), 2024-02-29
Supplement: s1 [file s1]

**Supplementary Table S1.** The values of degree, betweenness centrality, and closeness centrality results of the protein–protein interaction (PPI) network pharmacology analyses.

| AverageShortest<br>PathLength | Betweenness<br>Centrality | Closeness<br>Centrality | Clustering<br>Coefficient | Degree | Eccentr<br>icity | IsSingl<br>eNode | name       | Neighborhood<br>Connectivity | NumberOfDir<br>ectedEdges | NumberOfUndi<br>rectedEdges | PartnerOfMultiEd<br>gedNodePairs | Radiali<br>ty  | selecte<br>d | SelfLoo<br>ps | shared<br>name | Stress | Topological<br>Coefficient | Name        |
|-------------------------------|---------------------------|-------------------------|---------------------------|--------|------------------|------------------|------------|------------------------------|---------------------------|-----------------------------|----------------------------------|----------------|--------------|---------------|----------------|--------|----------------------------|-------------|
| 4.03030303                    | 0.27272727                | 0.2481203               | 0                         | 3      | 7                | FALSE            | MAPT       | 2.33333333                   | 0                         | 3                           | 0                                | 0.76689<br>977 | FALSE        | 0             | MAPT           | 368    | 0.33333333                 | ESR2        |
| 5.78787879                    | 0                         | 0.17277487              | 0                         | 1      | 9                | FALSE            | BACE1      | 4                            | 0                         | 1                           | 0                                | 0.63170<br>163 | FALSE        | 0             | BACE1          | 0      | 0                          | FLT3        |
| 1.66666667                    | 0                         | 0.6                     | 1                         | 3      | 3                | FALSE            | AURK<br>B  | 4.33333333                   | 0                         | 3                           | 0                                | 0.86666<br>667 | FALSE        | 0             | AURK<br>B      | 0      | 0.86666667                 | GSK3B       |
| 1.5                           | 0.02222222                | 0.66666667              | 0.83333333                | 4      | 3                | FALSE            | PLK1       | 3.75                         | 0                         | 4                           | 0                                | 0.9            | FALSE        | 0             | PLK1           | 2      | 0.75                       | HSD17<br>B1 |
| 1.5                           | 0.02222222                | 0.66666667              | 0.83333333                | 4      | 3                | FALSE            | TOP2A      | 3.75                         | 0                         | 4                           | 0                                | 0.9            | FALSE        | 0             | TOP2A          | 2      | 0.75                       | HSD17<br>B2 |
| 1.16666667                    | 0.55555556                | 0.85714286              | 0.5                       | 5      | 2                | FALSE            | CDK1       | 3.2                          | 0                         | 5                           | 0                                | 0.96666<br>667 | FALSE        | 0             | CDK1           | 18     | 0.6                        | IGF1R       |
| 3.33333333                    | 0                         | 0.3                     | 0                         | 1      | 6                | FALSE            | AXL        | 13                           | 0                         | 1                           | 0                                | 0.82051<br>282 | FALSE        | 0             | AXL            | 0      | 0                          | INSR        |
| 5                             | 0                         | 0.2                     | 0                         | 1      | 8                | FALSE            | CAMK<br>2B | 3                            | 0                         | 1                           | 0                                | 0.69230<br>769 | FALSE        | 0             | CAMK<br>2B     | 0      | 0                          | KDR         |
| 1.66666667                    | 0.33333333                | 0.6                     | 0                         | 2      | 2                | FALSE            | CDK2       | 3                            | 0                         | 2                           | 0                                | 0.86666<br>667 | FALSE        | 0             | CDK2           | 10     | 0.5                        | MAPT        |
| 1.66666667                    | 0                         | 0.6                     | 1                         | 3      | 3                | FALSE            | NEK2       | 4.33333333                   | 0                         | 3                           | 0                                | 0.86666<br>667 | FALSE        | 0             | NEK2           | 0      | 0.86666667                 | MET         |
| 2.5                           | 0                         | 0.4                     | 0                         | 1      | 3                | FALSE            | CDK6       | 2                            | 0                         | 1                           | 0                                | 0.7            | FALSE        | 0             | CDK6           | 0      | 0                          | MMP2        |
| 2.84848485                    | 0.37878788                | 0.35106383              | 0                         | 2      | 6                | FALSE            | ESR2       | 8.5                          | 0                         | 2                           | 0                                | 0.85780<br>886 | FALSE        | 0             | ESR2           | 520    | 0.5                        | MMP3        |
| 3.12121212                    | 0.00315657                | 0.32038835              | 0.8                       | 5      | 6                | FALSE            | EGFR       | 7.8                          | 0                         | 5                           | 0                                | 0.83682<br>984 | FALSE        | 0             | EGFR           | 12     | 0.4875                     | MMP9        |
| 3.12121212                    | 0.01704545                | 0.32038835              | 0.7                       | 5      | 6                | FALSE            | IGF1R      | 7.6                          | 0                         | 5                           | 0                                | 0.83682<br>984 | FALSE        | 0             | IGF1R          | 44     | 0.475                      | MPO         |
| 3.27272727                    | 0                         | 0.30555556              | 1                         | 3      | 6                | FALSE            | MET        | 8.33333333                   | 0                         | 3                           | 0                                | 0.82517<br>483 | FALSE        | 0             | MET            | 0      | 0.64102564                 | NEK2        |
| 3.06060606                    | 0.00820707                | 0.32673267              | 0.57142857                | 7      | 6                | FALSE            | PTK2       | 6.28571429                   | 0                         | 7                           | 0                                | 0.84149<br>184 | FALSE        | 0             | PTK2           | 26     | 0.39285714                 | PARP1       |
| 3.6969697                     | 0                         | 0.2704918               | 0                         | 1      | 6                | FALSE            | FLT3       | 11                           | 0                         | 1                           | 0                                | 0.79254<br>079 | FALSE        | 0             | FLT3           | 0      | 0                          | PIK3C<br>G  |
| 3.66666667                    | 0                         | 0.27272727              | 1                         | 2      | 6                | FALSE            | INSR       | 8                            | 0                         | 2                           | 0                                | 0.79487<br>179 | FALSE        | 0             | INSR           | 0      | 0.72727273                 | PIK3R1      |
| 3.18181818                    | 0                         | 0.31428571              | 1                         | 3      | 6                | FALSE            | KDR        | 10.33333333                  | 0                         | 3                           | 0                                | 0.83216<br>783 | FALSE        | 0             | KDR            | 0      | 0.64583333                 | PLK1        |
| 3.24242424                    | 0                         | 0.30841121              | 1                         | 2      | 6                | FALSE            | MMP2       | 8.5                          | 0                         | 2                           | 0                                | 0.82750<br>583 | FALSE        | 0             | MMP2           | 0      | 0.56666667                 | PTK2        |
| 3.18181818                    | 0.11931818                | 0.31428571              | 0.16666667                | 4      | 6                | FALSE            | MMP9       | 4.25                         | 0                         | 4                           | 0                                | 0.83216<br>783 | FALSE        | 0             | MMP9           | 138    | 0.28846154                 | SRC         |
| 4.15151515                    | 0                         | 0.24087591              | 0                         | 1      | 7                | FALSE            | MMP3       | 4                            | 0                         | 1                           | 0                                | 0.75757<br>576 | FALSE        | 0             | MMP3           | 0      | 0                          | SYK         |
| 4.15151515                    | 0                         | 0.24087591              | 0                         | 1      | 7                | FALSE            | MPO        | 4                            | 0                         | 1                           | 0                                | 0.75757<br>576 | FALSE        | 0             | MPO            | 0      | 0                          | TOP2A       |
| 3.21212121                    | 0                         | 0.31132075              | 1                         | 2      | 6                | FALSE            | SYK        | 12                           | 0                         | 2                           | 0                                | 0.82983<br>683 | FALSE        | 0             | SYK            | 0      | 0.75                       | TTR         |

**Supplementary Table S2.** SMILES Canonical for from seagrass *Enhalus acoroides*

| Samples | NO  | Compounds                            | SMILES Canonical                                                                          |
|---------|-----|--------------------------------------|-------------------------------------------------------------------------------------------|
| EAE     | C1  | Thalassiolin A                       | <chem>C1=CC(=C(C=C1C2=CC(=O)C3=C(C=C(C=C3O2)OC4C(C(C(C(O4)CO)O)O)OS(=O)(=O)O)O)O)O</chem> |
|         | C2  | Luteolin                             | <chem>C1AR=CC(=C(C=C1C2=CC(=O)C3=C(C=C(C=C3O2)O)O)O)O</chem>                              |
|         | C3  | luteolin-O-sulphate                  | <chem>O=C1C=C(C2=CC=C(O)C(O)=C2)OC3=C1C(OS(=O)(O)=O)=CC(O)=C3</chem>                      |
|         | C4  | Myricetin                            | <chem>C1=C(C=C(C(=C1O)O)O)C2=C(C(=O)C3=C(C=C(C=C3O2)O)O)O</chem>                          |
|         | C5  | di-O-caffeoyl tartaric acid          | <chem>O=C(O)C(C(C(O)=O)OOC/C=C/C1=CC=C(O)C(O)=C1)OOC/C=C/C2=CC=C(O)C(O)=C2</chem>         |
| EAH     | C6  | 6-hydroxy luteolin O-glucoside       | <chem>C1=CC(=C(C=C1C2=CC(=O)C3=C(C=C(C=C3O2)OC4C(C(C(C(O4)CO)O)O)O)O)O)O</chem>           |
|         | C7  | Oleamide                             | <chem>CCCCCCCCC=CCCCCCCCC(=O)N</chem>                                                     |
|         | C8  | Thalassiolin C                       | <chem>C1=CC(=CC=C1C2=CC(=O)C3=C(C=C(C=C3O2)OC4C(C(C(C(O4)CO)O)O)OS(=O)(=O)O)O)O</chem>    |
|         | C9  | O-caffeoyl-O-coumaroyl tartaric acid | <chem>OC(C(O)=O)C(OC(/C=C/C1=CC=CC=C1OC(/C=C/C2=CC=C(O)C(O)=C2)=O)=O)C(O)=O</chem>        |
|         | C10 | Betaine                              | <chem>C[N+](C)(C)CC(=O)[O-]</chem>                                                        |
